# Supplementary material for: A Comprehensive Evaluation of Salt Tolerance in Tomato (Var. Ailsa Craig): Responses of Physiological and Transcriptional Changes in RBOH’s and ABA Biosynthesis and Signalling Genes
Source: MDPI journal article supplement (doi:10.3390/ijms23031603), 2022-01-29
Supplement: s1 [file s1]

**Table S1:** Effects of salt stress on the gas exchange parameters and the maximum photochemical efficiency (Fv/Fm) of tomato leaves.

| Treat  | Pn          | Gs           | Ci            | Tr          | Fm/Fv        |
|--------|-------------|--------------|---------------|-------------|--------------|
| 0 day  | 18.18±1.64a | 0.53 ± 0.03a | 280.5±8.1a    | 3.63 ±0.29a | 0.72 ±0.01a  |
| 3 day  | 15.87±0.5b  | 0.25 ± 0.00b | 255±10.92b    | 3.02 ±0.08b | 0.64 ±0.05ab |
| 6 day  | 14.9±0.29b  | 0.14 ± 0.00c | 238.5 ± 5.06b | 2.71±0.08b  | 0.57 ±0.01b  |
| 12 day | 12.82±1.23c | 0.02 ± 0.01d | 214.75±17.8c  | 2.27 ±0.15c | 0.32 ±0.09c  |

Data represent the mean and standard deviation (SD) of three replications. Different letters indicate significant differences according to 'Tukey's HSD test at  $P \leq 0.05$ .

**Table S2:** List of primers used for qRT-PCR assays

| Gene full name                      | Gene acronym   | Accession number | Forward primer (5'-3')  | Reverse primer (5'-3') |
|-------------------------------------|----------------|------------------|-------------------------|------------------------|
| Superoxide dismutase                | <i>SOD</i>     | Solyc02g082590   | ACTACTCCCAGTTGCATCCC    | CACCAGGAGCAGCCATGATA   |
| Catalase                            | <i>CAT</i>     | Solyc12g094620   | GCAGCTCCCAGTTAATGCTC    | AGCAGGACGACAAGGATCAA   |
| Peroxidase                          | <i>POD</i>     | Solyc07g052510   | GGTCTGTTCCAATCCGATGC    | CACCAGCACTCCCTGTCTTA   |
| Ascorbate peroxidase                | <i>APX</i>     | Solyc06g005150   | GGCACTCTGCTGGTACCTAT    | GGAGAGAGTGGGAAACTGCT   |
| Glutathione reductase               | <i>GR</i>      | Solyc09g065900   | GGAGCCATAGAGGTTGACGA    | CTCCTCCCTCCATCAAAGCA   |
| Monodehydroascorbate reductase      | <i>MDHAR</i>   | Solyc08g081530   | CGGACAGTTCCGAACAAACA    | CCCGTGCAATTCGGTTGTAT   |
| Dehydroascorbate reductase          | <i>DHAR</i>    | Solyc05g054760   | GAGGTGAACCCTGAAGGGAA    | CCCACAGAGGCAAATTCAGG   |
| Respiratory Burst Oxidase Homolog1  | <i>RBOH1</i>   | Solyc08g081690   | TCCAGCACAAAGATTACCG     | CCTCCATTGCGACGAT       |
| Respiratory Burst Oxidase Homolog-A | <i>SIRBOHA</i> | Solyc01g099620   | GAGAGTAGGATTCAGCGGT     | GCCTCTTTTCGAGCTTGCT    |
| Respiratory Burst Oxidase Homolog-D | <i>SIRBOHD</i> | Solyc06g068680   | TACACCACCAAATCTAACG     | TGCCCAGTGCTTCAATC      |
| Respiratory Burst Oxidase Homolog-E | <i>SIRBOHE</i> | Solyc06g075570   | GGGTCCTAACATTGTGGTTGT   | AGAGTCTCTCCTGCACCTTTA  |
| Respiratory Burst Oxidase Homolog-F | <i>SIRBOHF</i> | Solyc07g042460   | GCAGTCAAAACGATCC        | CATTGCTCCTCCGACAT      |
| Respiratory Burst Oxidase Homolog-H | <i>SIRBOHH</i> | Solyc11g072800   | CATGTGTGACAAGAATGGTGATG | TGCTGCATGTTTCTTGAAGTTT |
| Zeaxanthin epoxidase                | <i>SIZEP</i>   | Solyc02g090890   | TCTGGAAGCCCTGTGGAT      | TCCGACGCCAAGATAAGC     |
| 9-cis-epoxycarotenoid dioxygenase-1 | <i>SINCED1</i> | Solyc01g087250   | GCTGGATTATGACAAACG      | TAAGTGATGTAAGGTGGG     |
| 9-cis-epoxycarotenoid dioxygenase-3 | <i>SINCED3</i> | Solyc07g056570   | CGTGGGCTCTTCGGACTT      | ATGGCTTCTGAATCACATCGTA |
| 9-cis-epoxycarotenoid dioxygenase-5 | <i>SINCED5</i> | Solyc08g016720   | TACTGAAACGGAAAGATTAG    | ACTCCACGGGCATAGAAC     |
| Abscisic-aldehyde oxidase3          | <i>SIAAO3</i>  | Solyc01g009230   | GGAGGCAAGGCAGTGAAA      | CAAGATGTAAGGCGGTGA     |
| Abscisic Acid Insensitive3          | <i>SLABI3</i>  | Solyc06g083590   | GGGACTTGTCGTGTTTGG      | CACCTTATGTCGGCGTAT     |

|                                                     |                  |                |                     |                     |
|-----------------------------------------------------|------------------|----------------|---------------------|---------------------|
| Absciscic Acid Insensitive5                         | <i>SLAB15</i>    | Solyc02g088910 | GGTGGGAGTAATAATGGTC | TCTGAAGGCTTGATGCTA  |
| Sucrose non-fermenting-1-related protein kinase 2.2 | <i>SlSnRK2.2</i> | Solyc02g090390 | GAAAGAGGCGATAAGATAG | AATAGCGAGATGAGTTGG  |
| Sucrose non-fermenting-1-related protein kinase 2.3 | <i>SlSnRK2.3</i> | Solyc01g108280 | GGCAGTGACAGTAGGACC  | TCCATCACAATAGCCAAA  |
| Sucrose non-fermenting-1-related protein kinase 2.6 | <i>SlSnRK2.6</i> | Solyc01g103940 | AGAAATCAAGTCGCACCC  | AGACTGAACGGGAAACTG  |
| Pyrabactin Resistance1-like4                        | <i>SIPYL4</i>    | Solyc09g015380 | CAACCACCACCAGCACCT  | ACCCGCACTTCACGGACAG |
| Pyrabactin Resistance1-like8                        | <i>SIPYL8</i>    | Solyc01g095700 | TTCGGTTATTACAGTCCA  | TCTCTTTAGTGTTCCCT   |
| binding factor (ABF) members 4                      | <i>SLABF4</i>    | Solyc04g078840 | ACAGCCACAGCAGCAACC  | GCTCTTCCCAAGTCCATC  |
| dehydration-responsive element-2                    | <i>SIDREB2</i>   | Solyc09g065990 | GGAAGACCAGGAGGGAGA  | GGTAGTTTGAAGCCACATA |
